# Supplementary figures and images for: Sidewall modification of single-walled carbon nanotubes using photolysis of perfluoroazooctaneElectronic supplementary information (ESI) available: Fig. S1. UV-vis-NIR spectra of pristine and modified SWNTs. See http://www.rsc.org/suppdata/cc/b4/b402206h/
Source: Royal Society of Chemistry journal article supplement (doi:10.1039/b402206h), 2004-01-01

Fig. S1

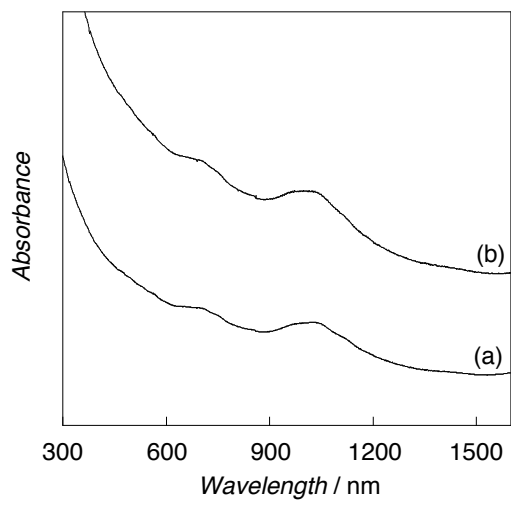

Supplement: b402206h.pdf [file b402206h.pdf]

Fig. S1

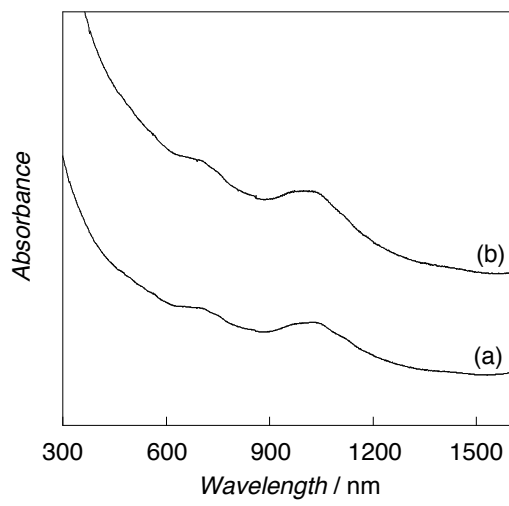

Supplement: b402206h.pdf [file b402206h.pdf]
